# Supplementary material for: miR-21-3p and miR-192-5p in patients with type 2 diabetic nephropathy
Source: publisher site journal article supplement (doi:10.1515/dx-2022-0036), 2022-08-17
Supplement: Supplementary file 1 [file j_dx-2022-0036_suppl.docx]

**Supplemental Material**

**Supplemental Table 1.** Formulas for creatinine clearance and estimated glomerular filtration rates (eGFRs)

| - Creatinine clearance (CrCl), mL/min = (UCREA × 24-hour urine volume [mL]) / (SCREA × 1440) |
| --- |
| UCREA is urine creatinine (mg/dL), SCREA is serum creatinine (mg/dL). |
| - Modification of Diet in Renal Disease (MDRD) eGFR, mL/min/1.73m² = 175 × SCREA-1.154 × Age-0.203 (× 0.742 if female) (× 1.212 if black) |
| SCREA is serum creatinine (mg/dL). |
| - 2012 Chronic Kidney Disease Epidemiology Collaboration (CKD-EPI)-creatinine eGFR, mL/min/1.73m² = 141 × min (SCREA/к,1)α  × max (SCREA/к, 1)-1.209 × 0.993Age × 1.018 (if female) × 1.159 (if black)   SCREA is serum creatinine (mg/dL), к is 0.7 for females and 0.9 for males, α is -0.329 for females and -0.411 for males, min indicates the minimum of SCREA/к or 1, and max indicates the maximum of SCREA/к or 1. |
| - Chronic Kidney Disease Epidemiology Collaboration (CKD-EPI)- Cystanin C eGFR, mL/min/1.73m² = 133 × min (SCys C/0.8, 1)-0.499× max (SCys C/0.8, 1)-1.328 × 0.996Age × 0.932 (if female)   SCys C is serum cystatin C (mg/dL), min indicates the minimum of SCys C/0.8 or 1, and max indicates the maximum of SCys C/0.8 or 1. |
| *To convert SCREA values in μmol/L to mg/dL, divide by 88.4. |

**Supplemental Table 2.** Target miRNA sequences

| miRNA type | Base sequence |
| --- | --- |
| miR-21-3p | CAACACCAGUCGAUGGGCUGU |
| miR-29a-3p | UAGCACCAUCUGAAAUCGGUUA |
| miR-29b-3p | UAGCACCAUUUGAAAUCAGUGUU |
| miR-29c-3p | UAGCACCAUUUGAAAUCGGUUA |
| miR-126-3p | UCGUACCGUGAGUAAUAAUGCG |
| miR-129-1-3p | AAGCCCUUACCCCAAAAAGUAU |
| miR-137 | UUAUUGCUUAAGAAUACGCGUAG |
| miR-192-5p | CUGACCUAUGAAUUGACAGCC |
| miR-212-3p | UAACAGUCUCCAGUCACGGCC |
| miR-320c | AAAAGCUGGGUUGAGAGGGU |

**Supplemental Table 3.** The ratios of miRNA relative expression values of the control and diabetic subgroups (fold change, 2-∆∆Ct)

| miRNA type |  | A1 | A2 | A3 |
| --- | --- | --- | --- | --- |
| miRNA-21-3p | Control | 3.97 | 4.54 | 6.60 |
|  | A1 |  | 1.14 | 2.23 |
|  | A2 |  |  | 1.66 |
| miR-29a-3p | Control | 1.53 | 2.51 | 2.19 |
|  | A1 |  | 1.64 | 1.43 |
|  | A2 |  |  | 0.87 |
| miR-29b-3p | Control | 0.77 | 1.13 | 0.84 |
|  | A1 |  | 1.46 | 1.09 |
|  | A2 |  |  | 0.74 |
| miR-29c-3p | Control | 2.23 | 2.64 | 1.80 |
|  | A1 |  | 1.18 | 0.80 |
|  | A2 |  |  | 0.68 |
| miR-126-3p | Control | 0.72 | 1.08 | 1.66 |
|  | A1 |  | 1.51 | 2.31 |
|  | A2 |  |  | 1.53 |
| miR-192-5p | Control | 1.61 | 3.13 | 2.27 |
|  | A1 |  | 1.95 | 1.41 |
|  | A2 |  |  | 0.72 |
| miR-212-3p | Control | 1.04 | 5.06 | 2.31 |
|  | A1 |  | 2 | 4.88 |
|  | A2 |  |  | 0.46 |
| miR-320c | Control | 2.17 | 1.85 | 1.47 |
|  | A1 |  | 0.85 | 0.68 |
|  | A2 |  |  | 0.80 |

The ratios are given as 2-ΔCt values of groups in the row / 2-ΔCt values of groups in the column.

A1- normal to mildly increased albuminuria, A2- moderately increased albuminuria, A3- severely increased albuminuria.
